# Supplementary material
Source: publisher figshare collection journal article supplement (https://aacr.figshare.com/articles/dataset/_/22490333)
Supplement: Supplementary file 1 [file 39941966]

**Fig. S1**

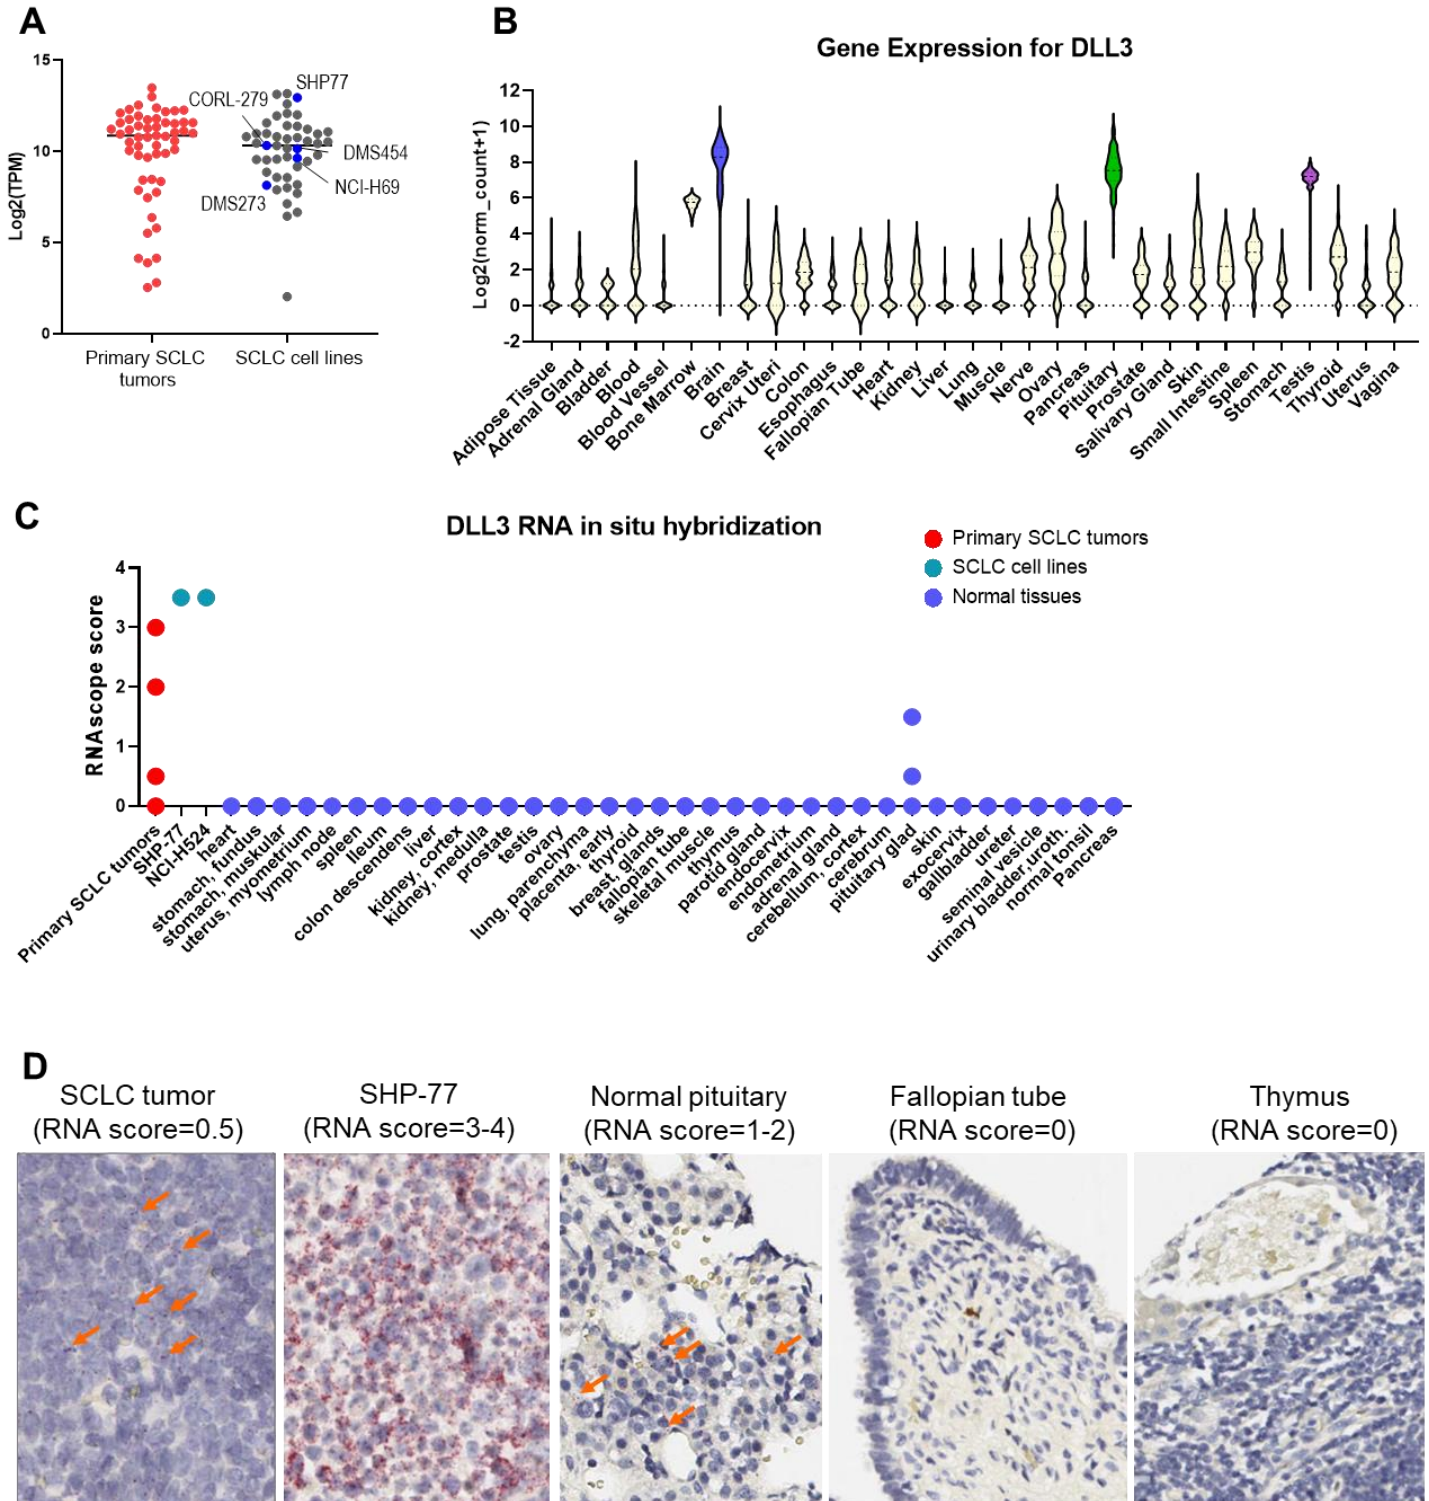

## Fig. S1 continued

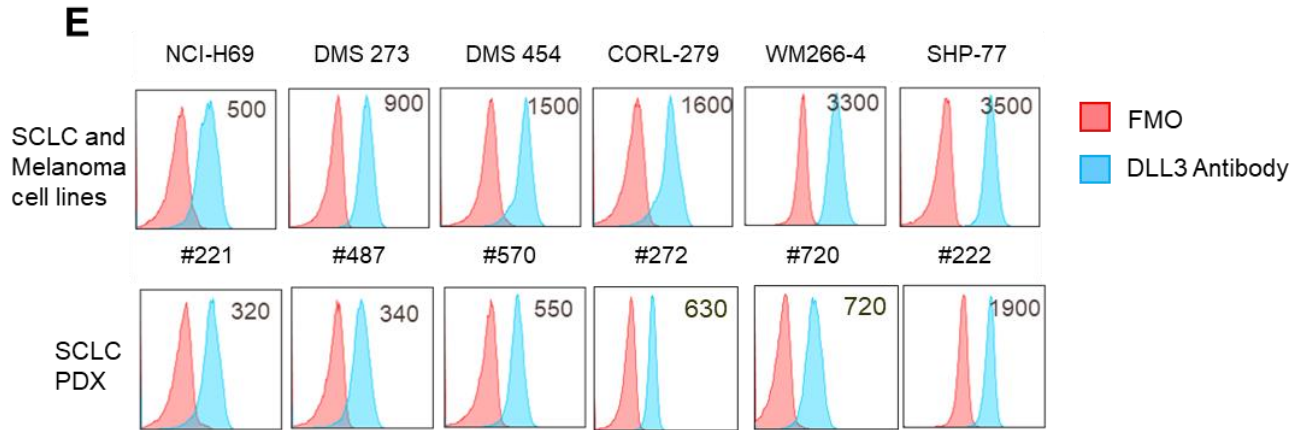

**Fig. S1 DLL3 is expressed in small cell lung tumors, PDX models and cell lines, with limited expression in normal tissue. (A)** DLL3 RNA analysis of primary SCLC tumors (n=55) and cell lines (n=47). TPM, transcripts per kilobase million. **(B)** mRNA expression of DLL3 in normal tissues according to GTEx RNASeq data (GTEx ENSG00000090932.10). TPM, transcripts per kilobase million. **(C)** RNA in situ hybridization analysis with probe specific for DLL3 shows DLL3 is expressed in SCLC tumors and cell lines. No expression was detected in normal tissues except brain, pituitary gland and testis. **(D)** Representative images of human DLL3 RNA in situ hybridization. DLL3 RNA expression is detected in SCLC tumor, SHP-77 SCLC cell line and normal pituitaries, but not other normal tissues. Red dots represent positive staining. Expression was given a semi-quantitative visual score (RNA score) of 0-4. **(E)** Quantification of DLL3 surface protein in SCLC cell lines and PDX models suggest most cell lines and PDX models express lower than 2000 copies of surface DLL3 molecules. Numbers in the graph indicate DLL3 surface copy number.
